# Supplementary material
Source: publisher figshare collection journal article supplement (https://gsajournals.figshare.com/articles/dataset/_/12378473)

**A**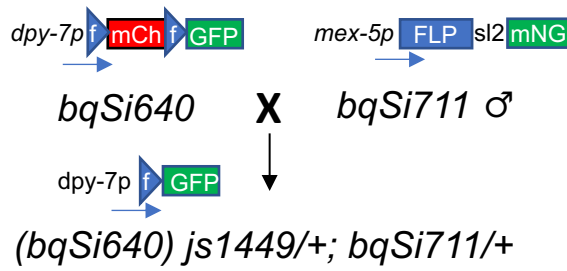**B**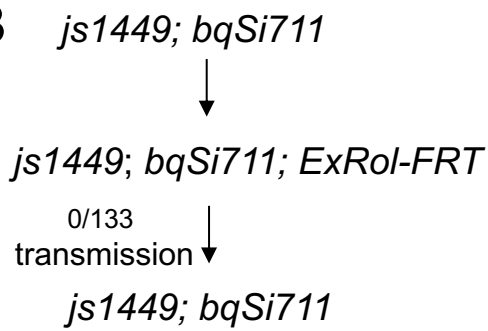**C**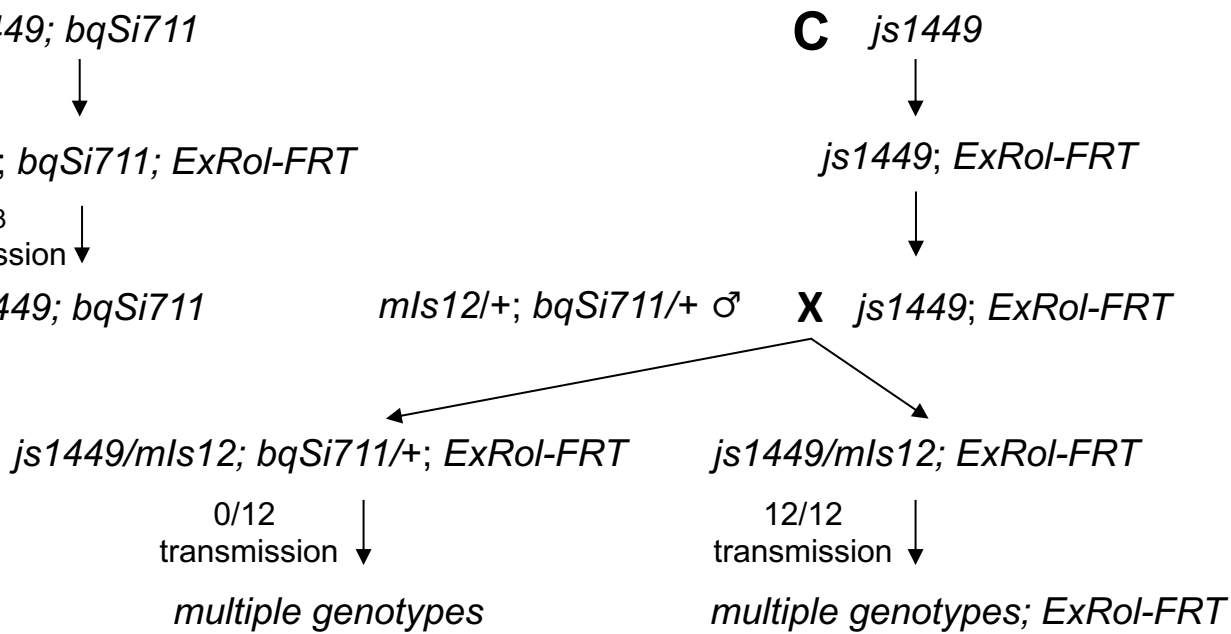**D**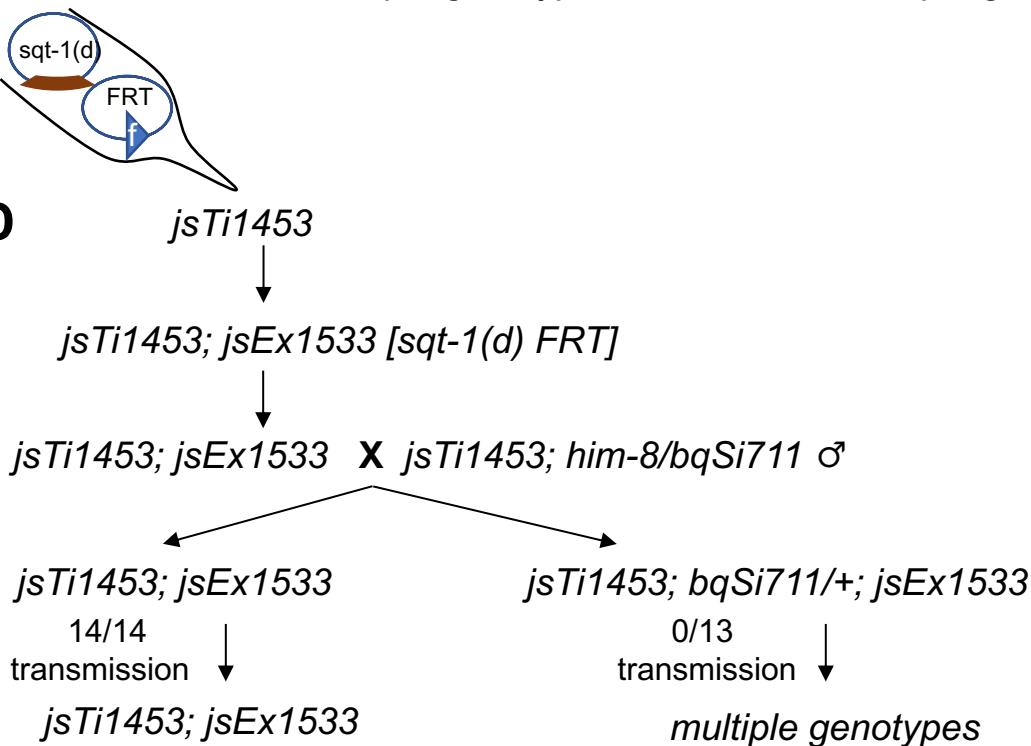

Figure S2

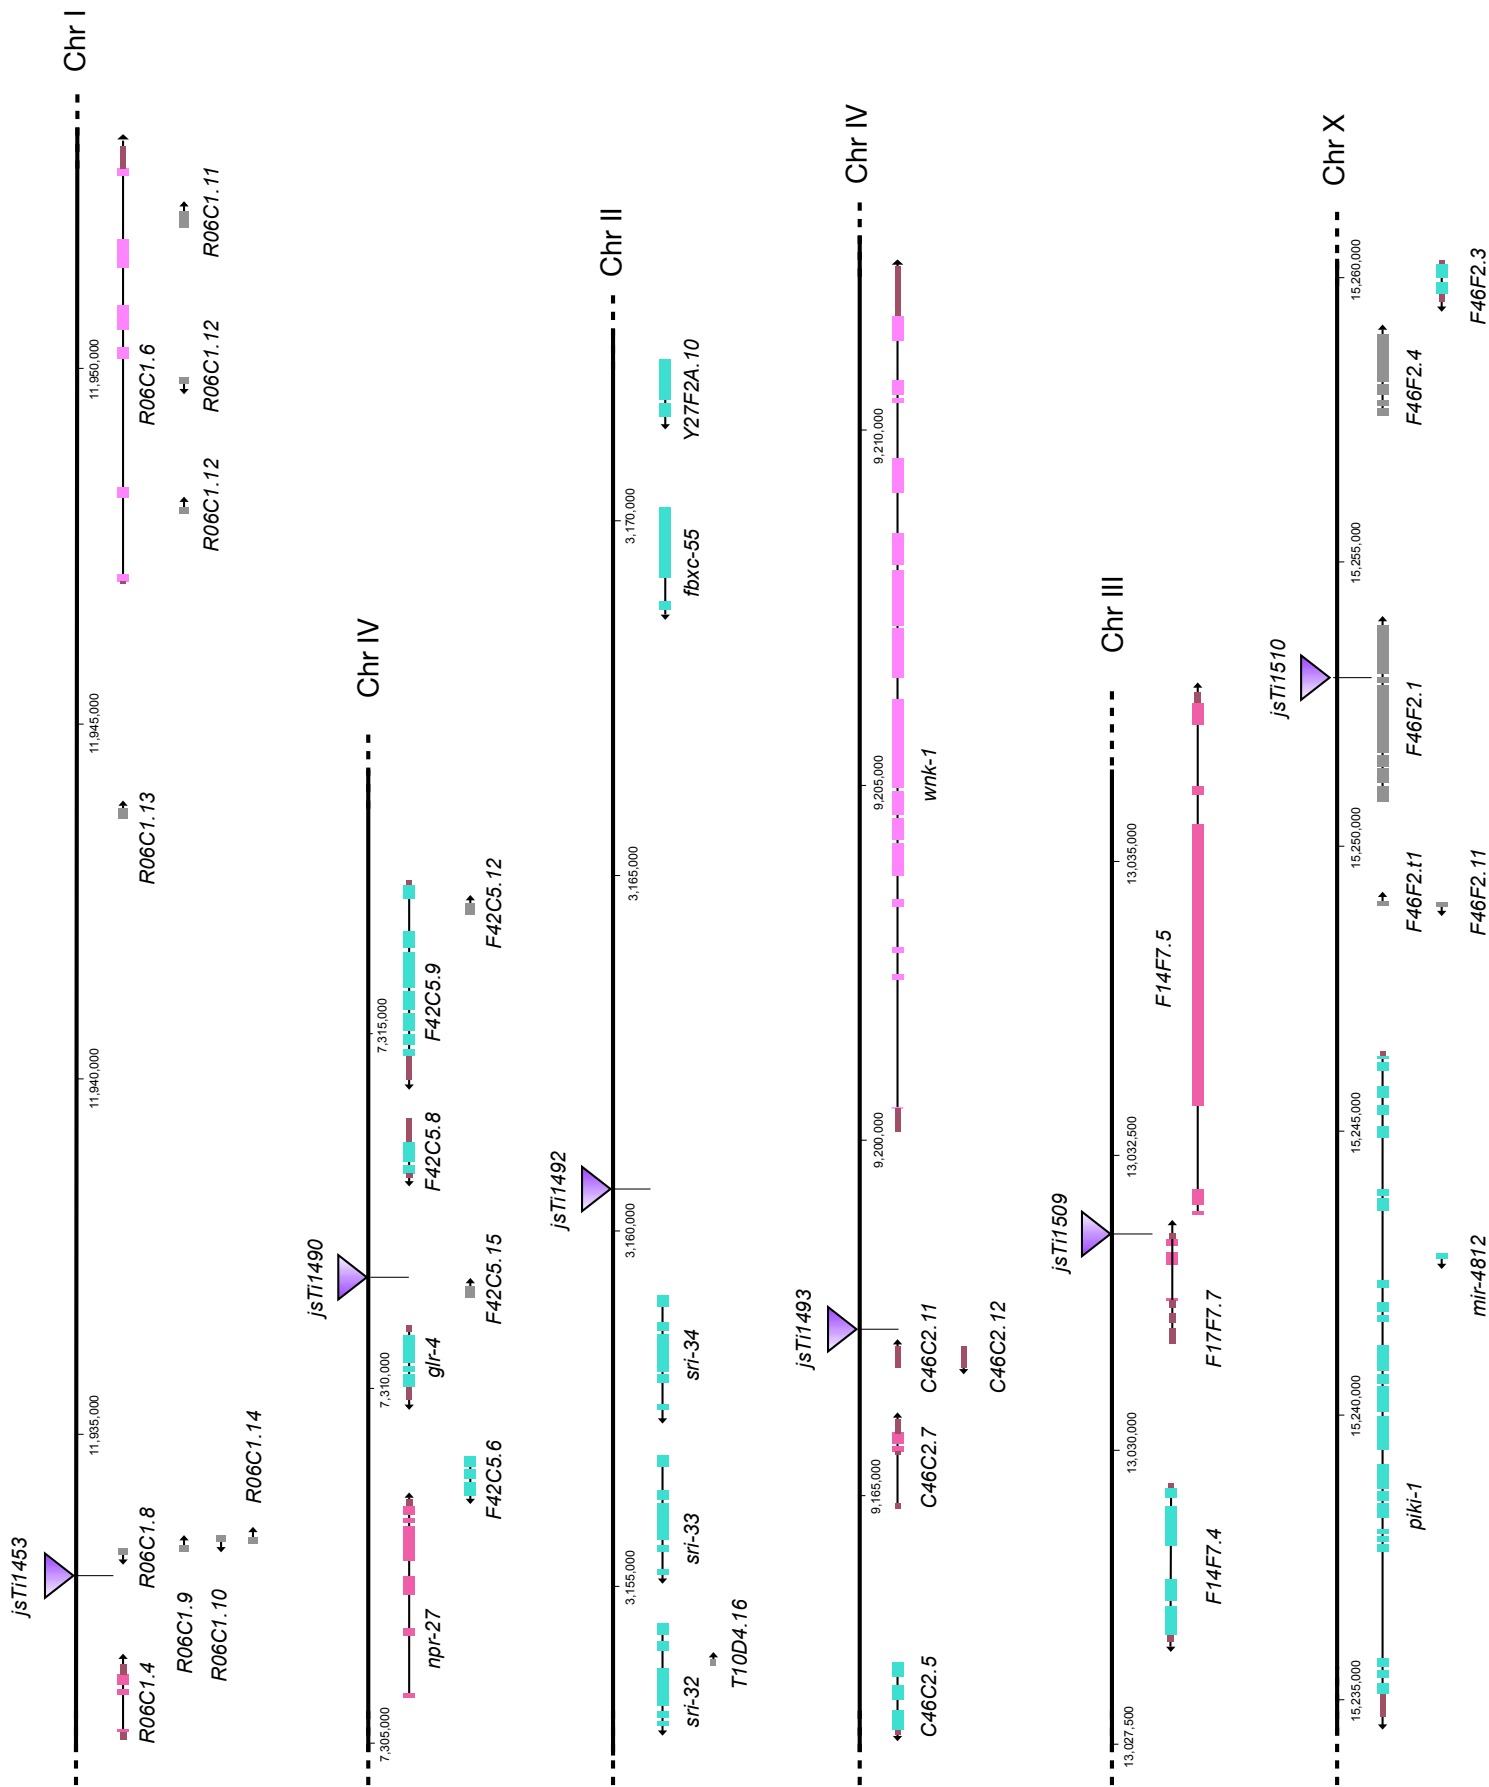

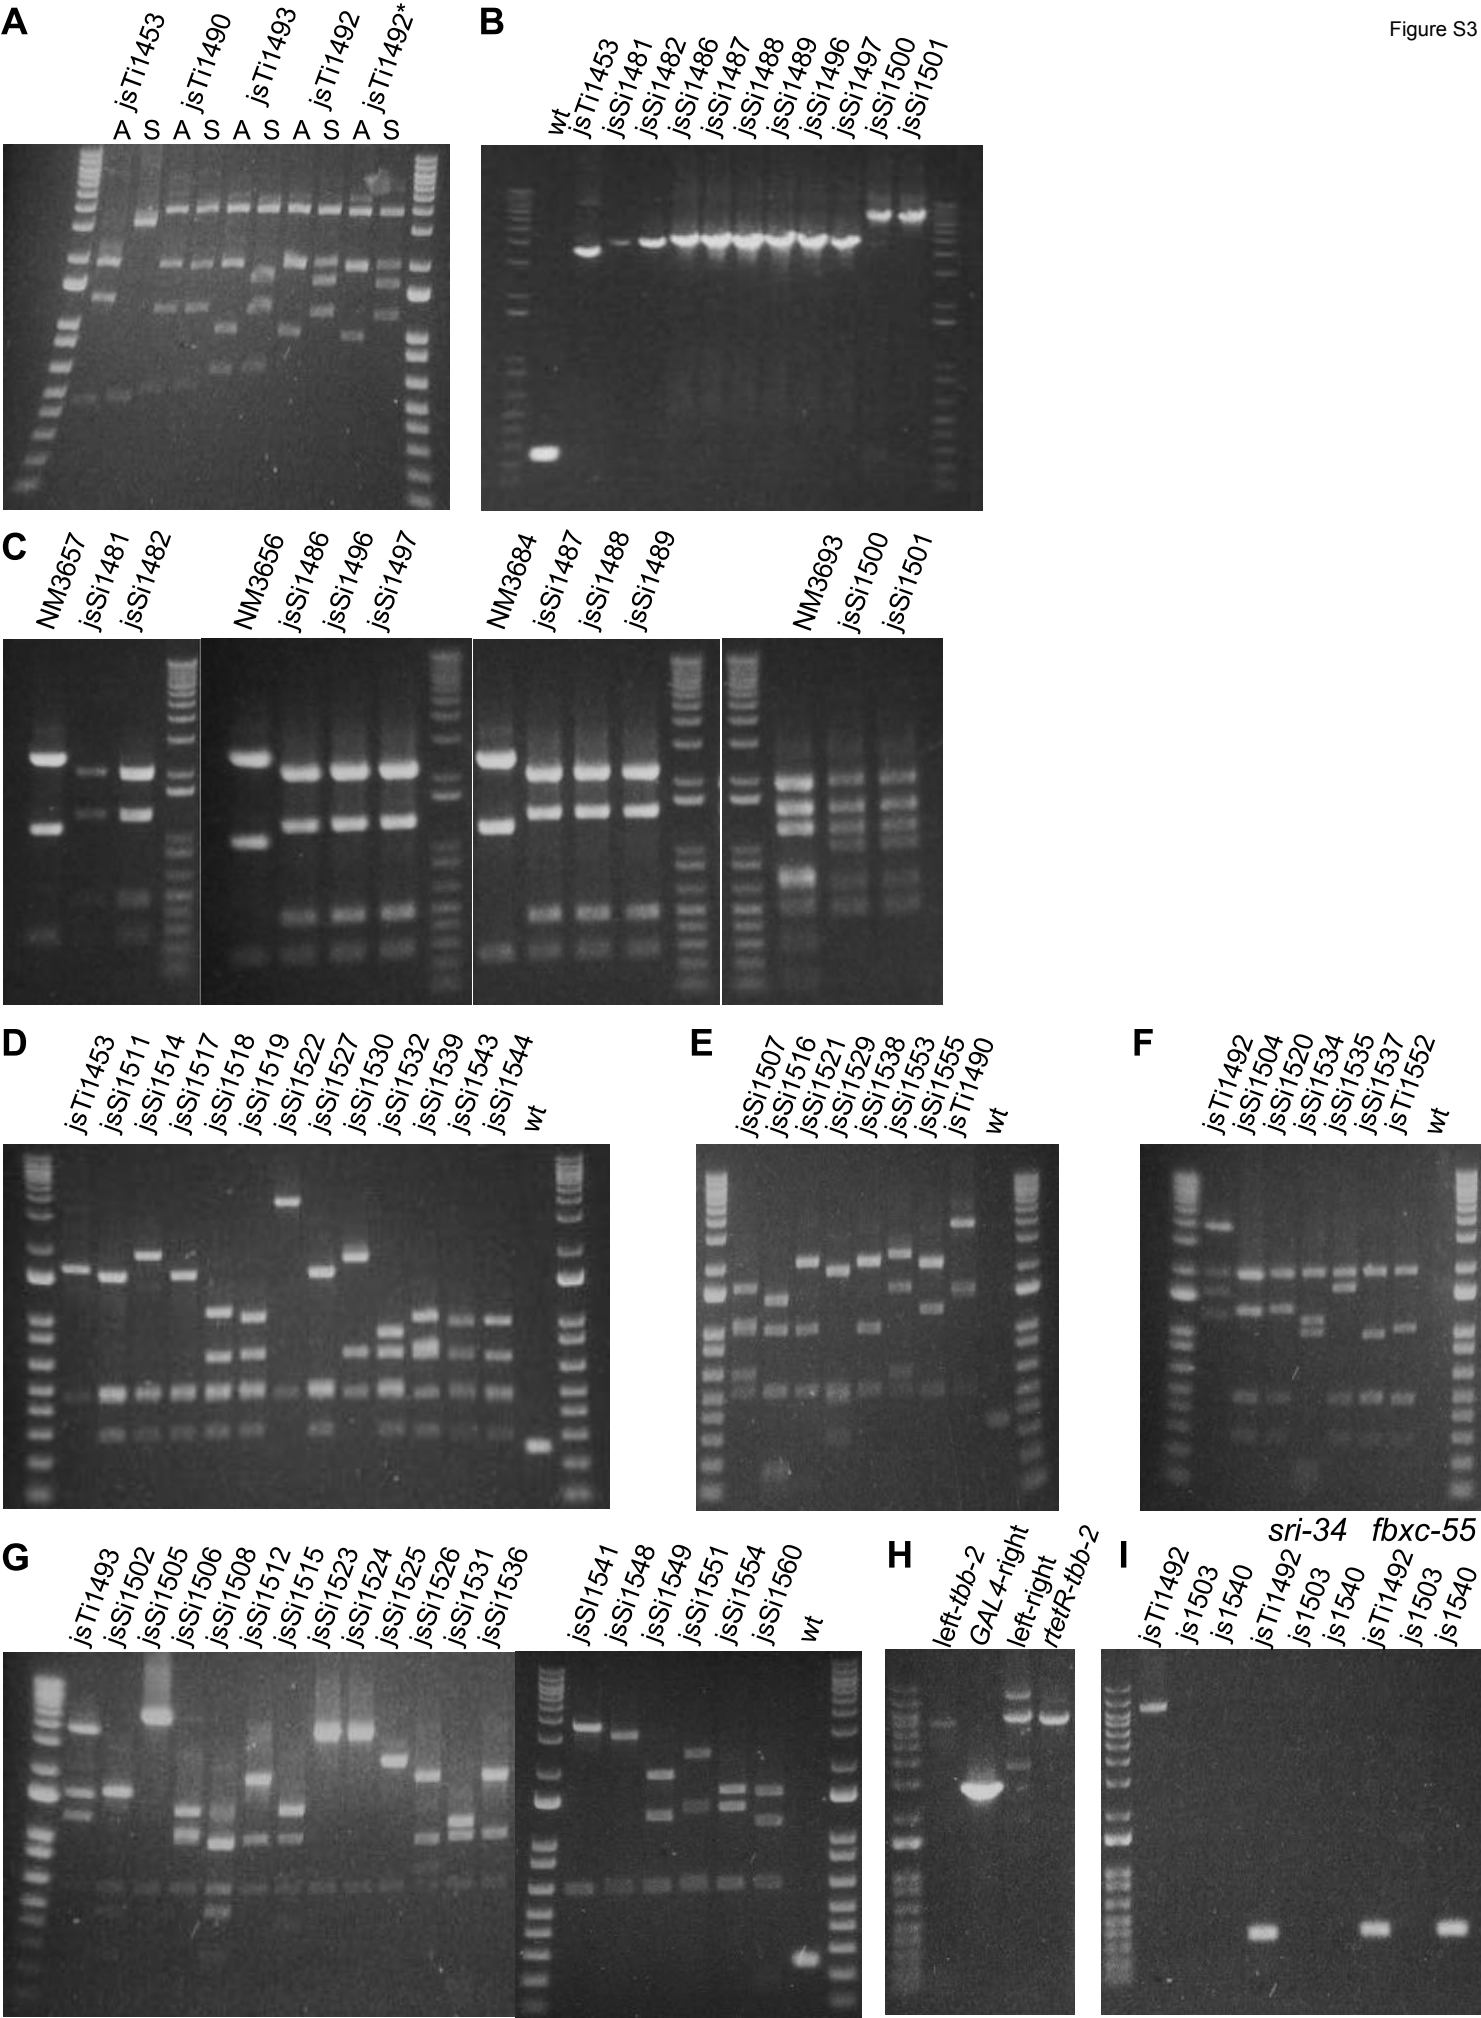

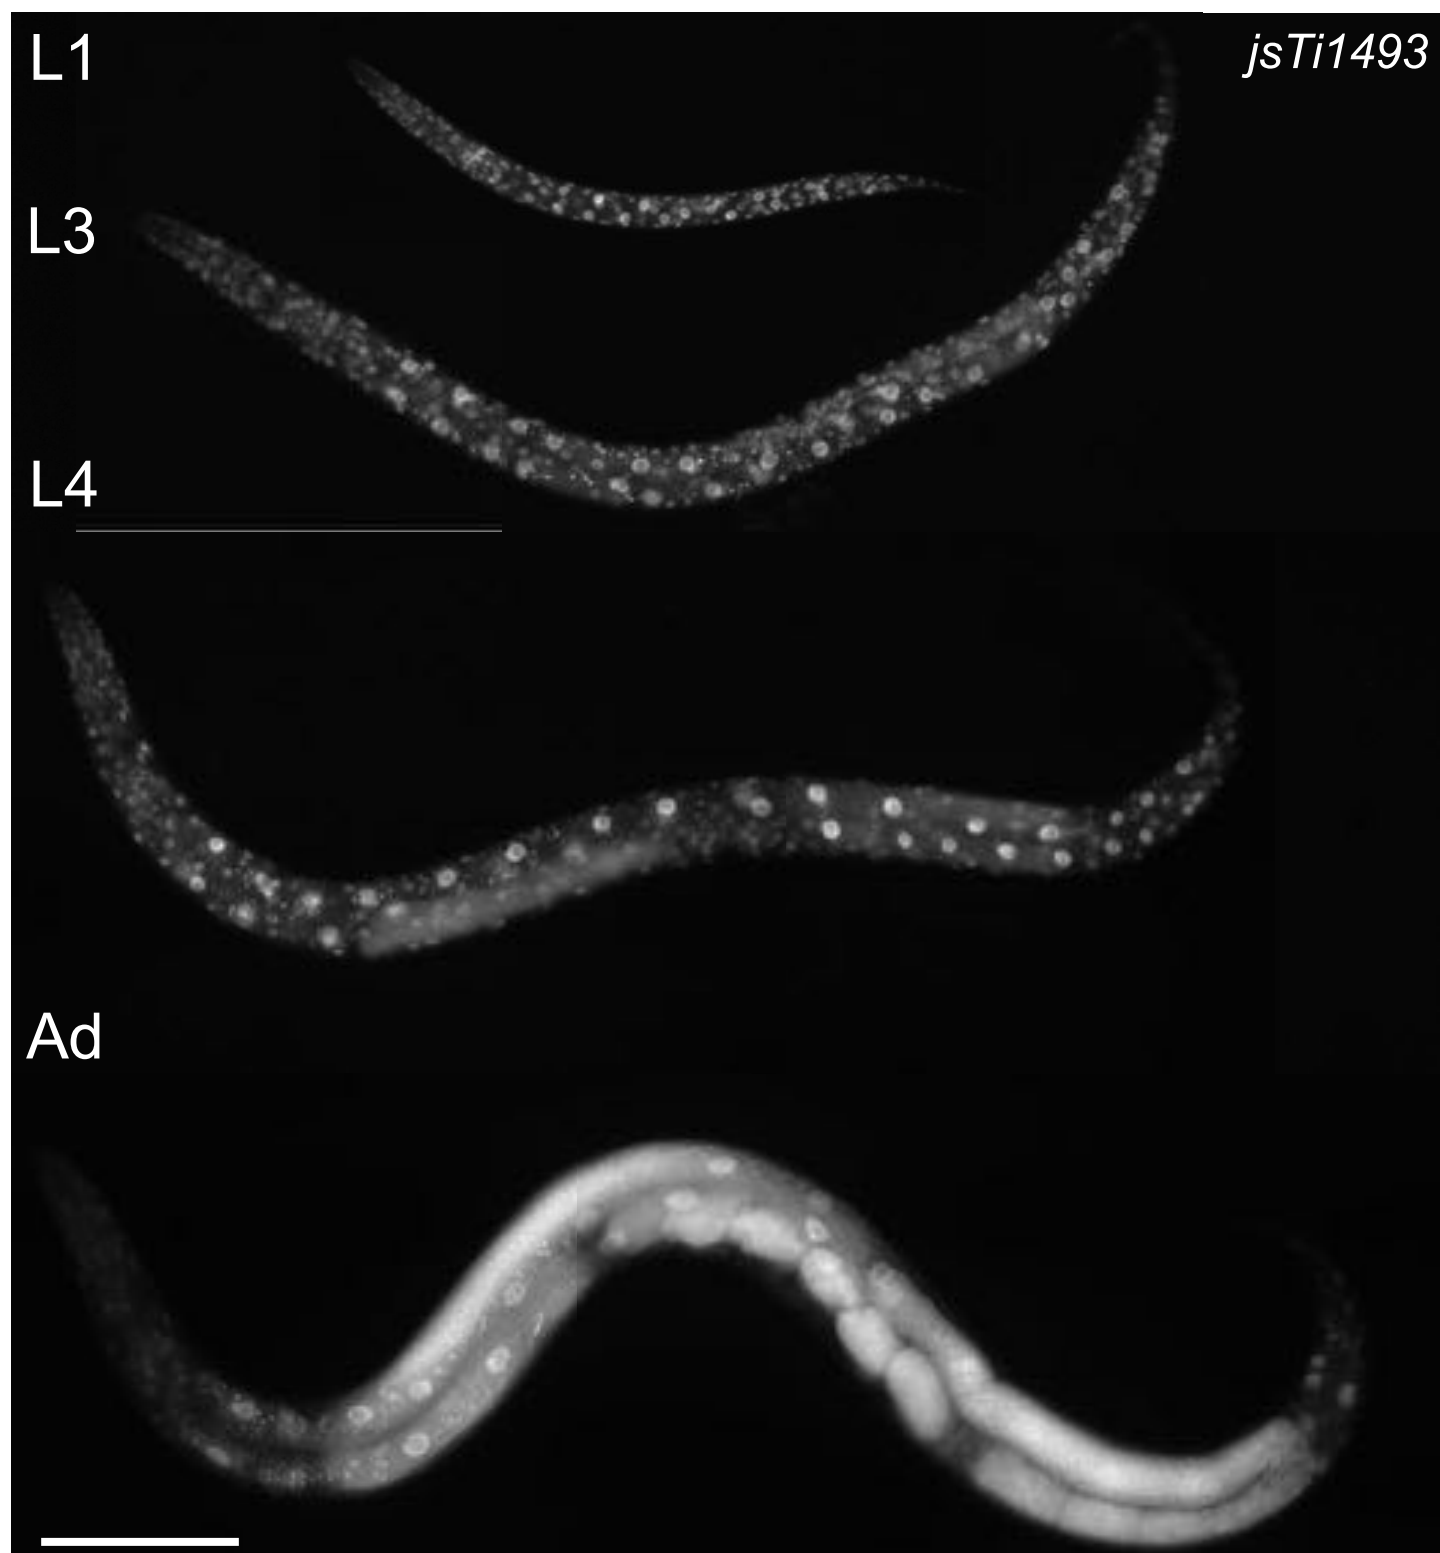



**A**

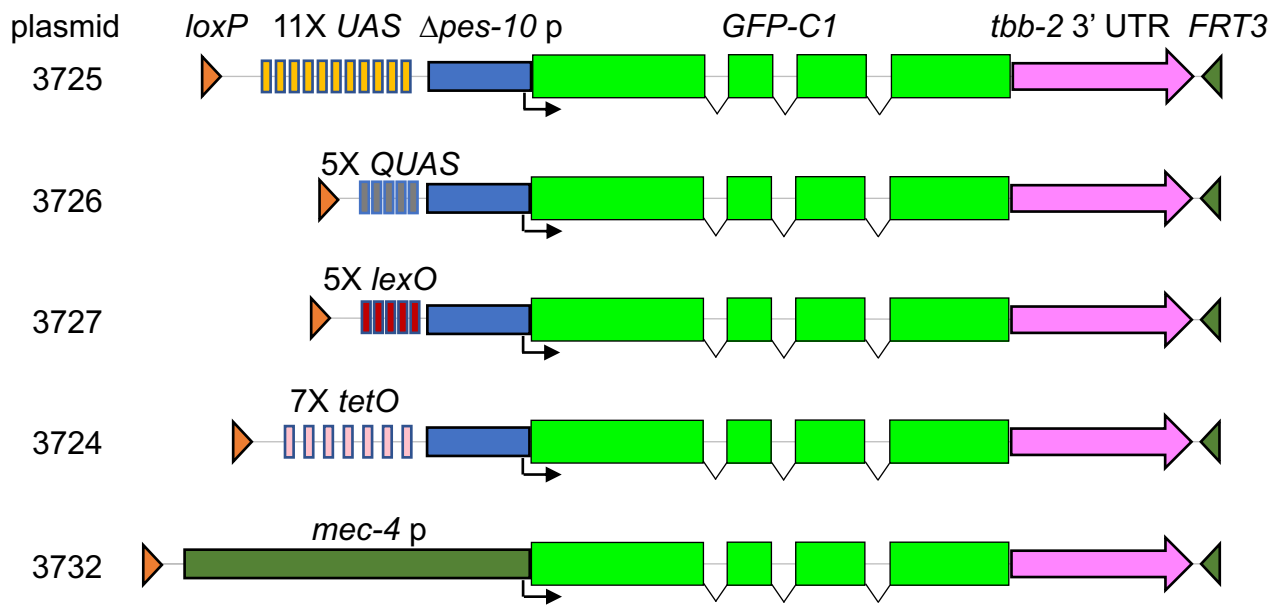

**B**

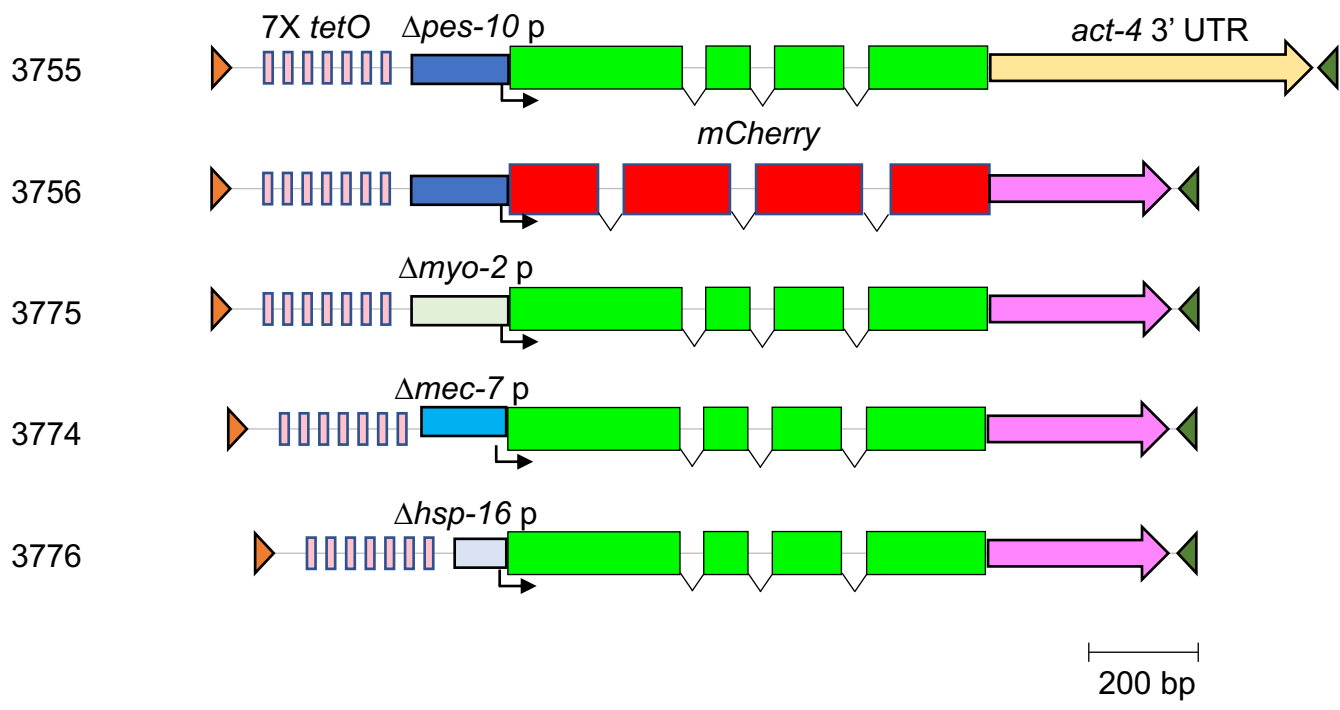

A

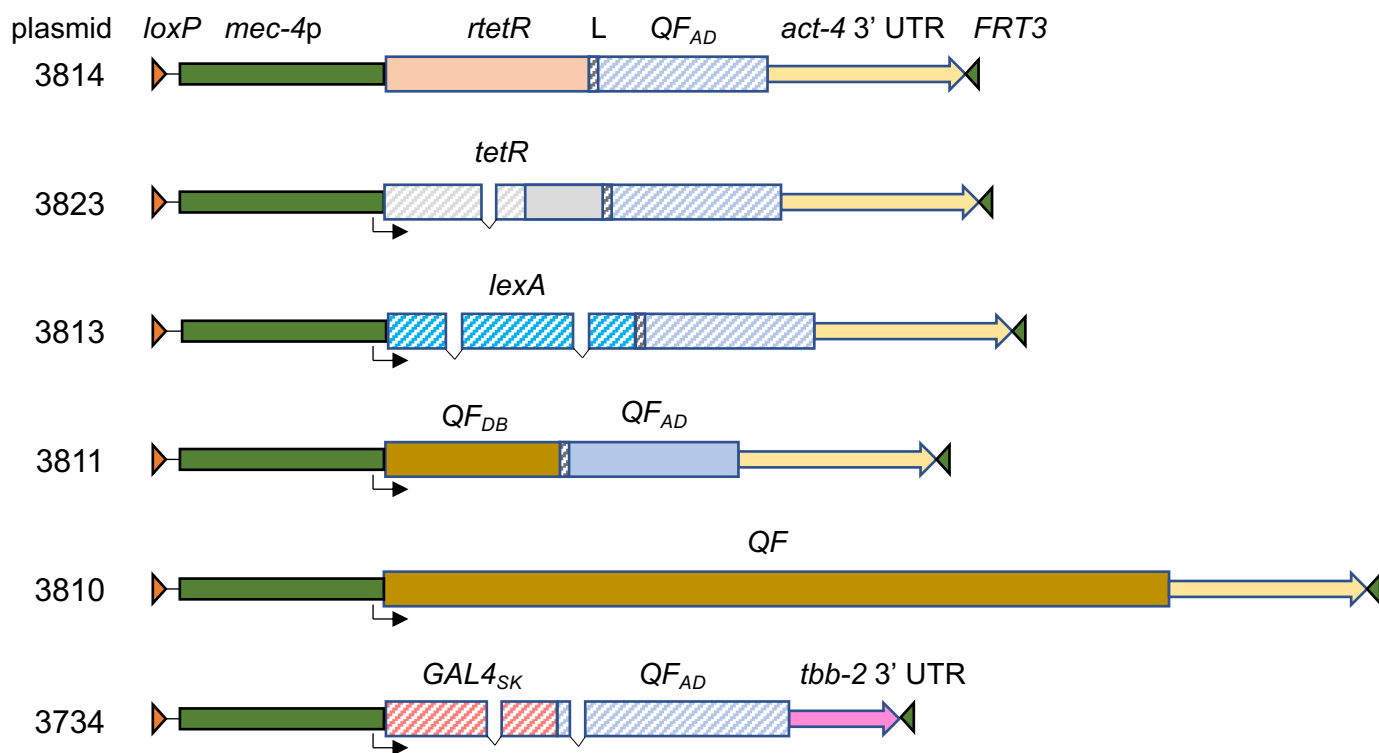

B

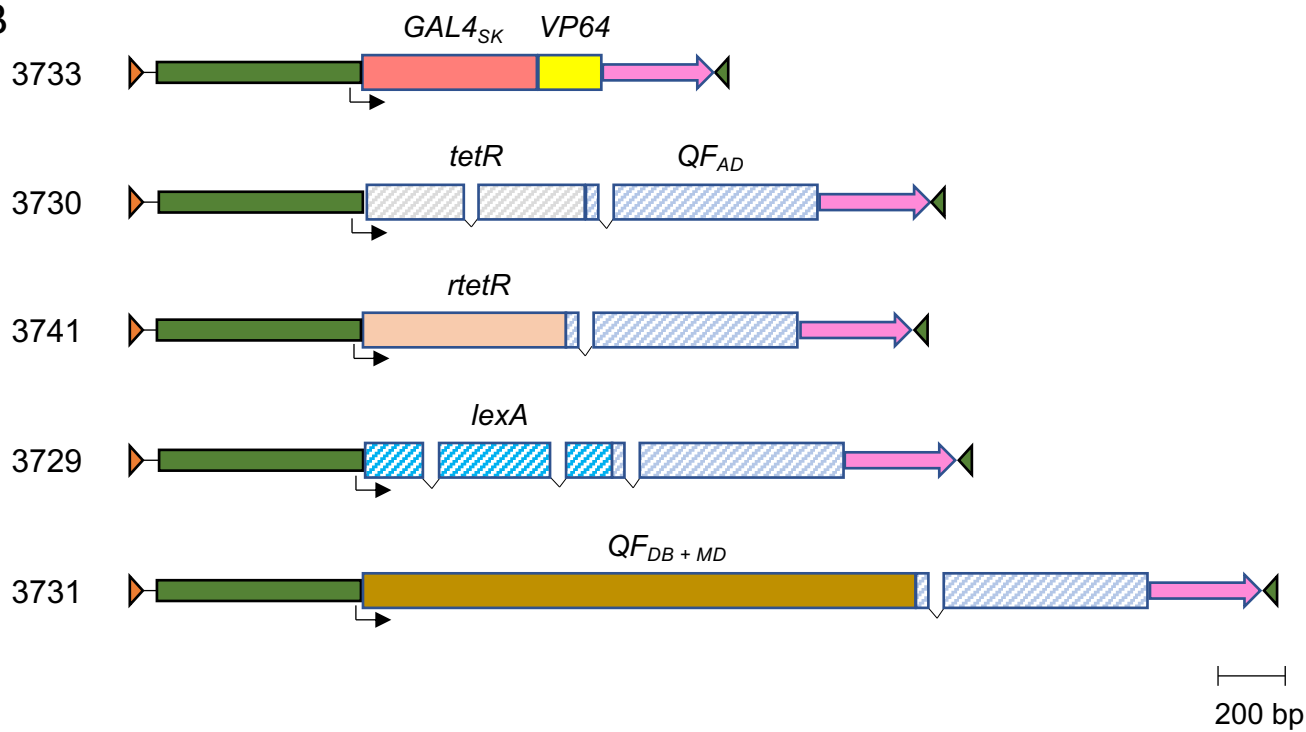

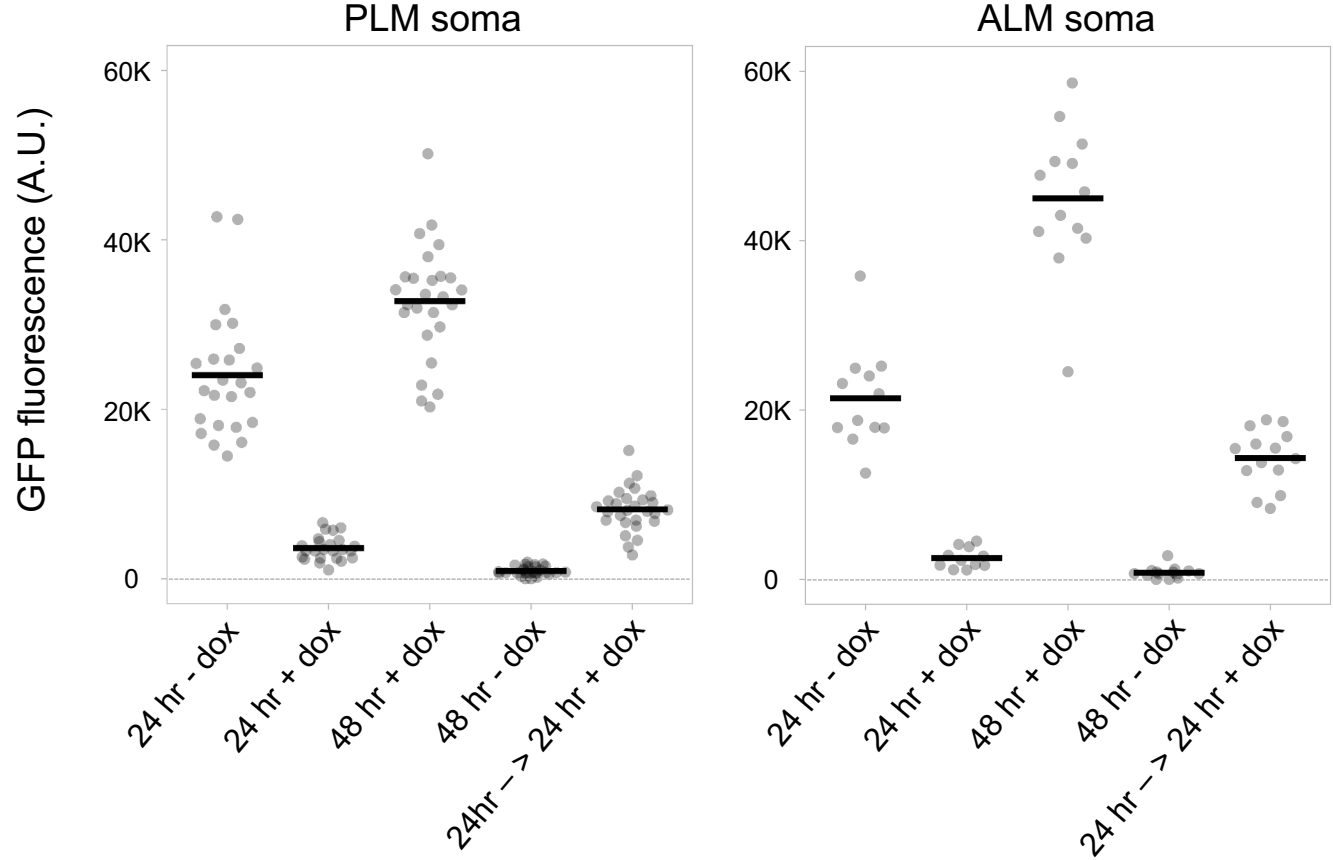

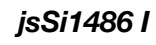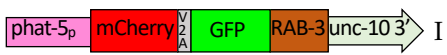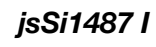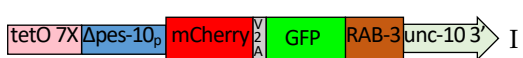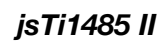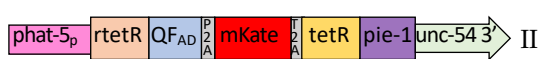

**-DOX**

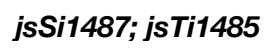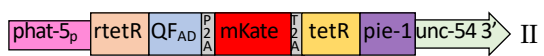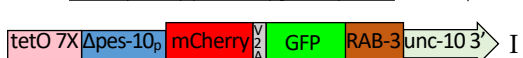

**+DOX**

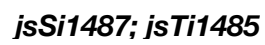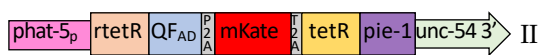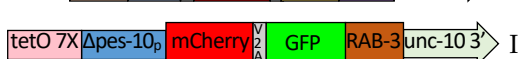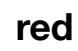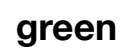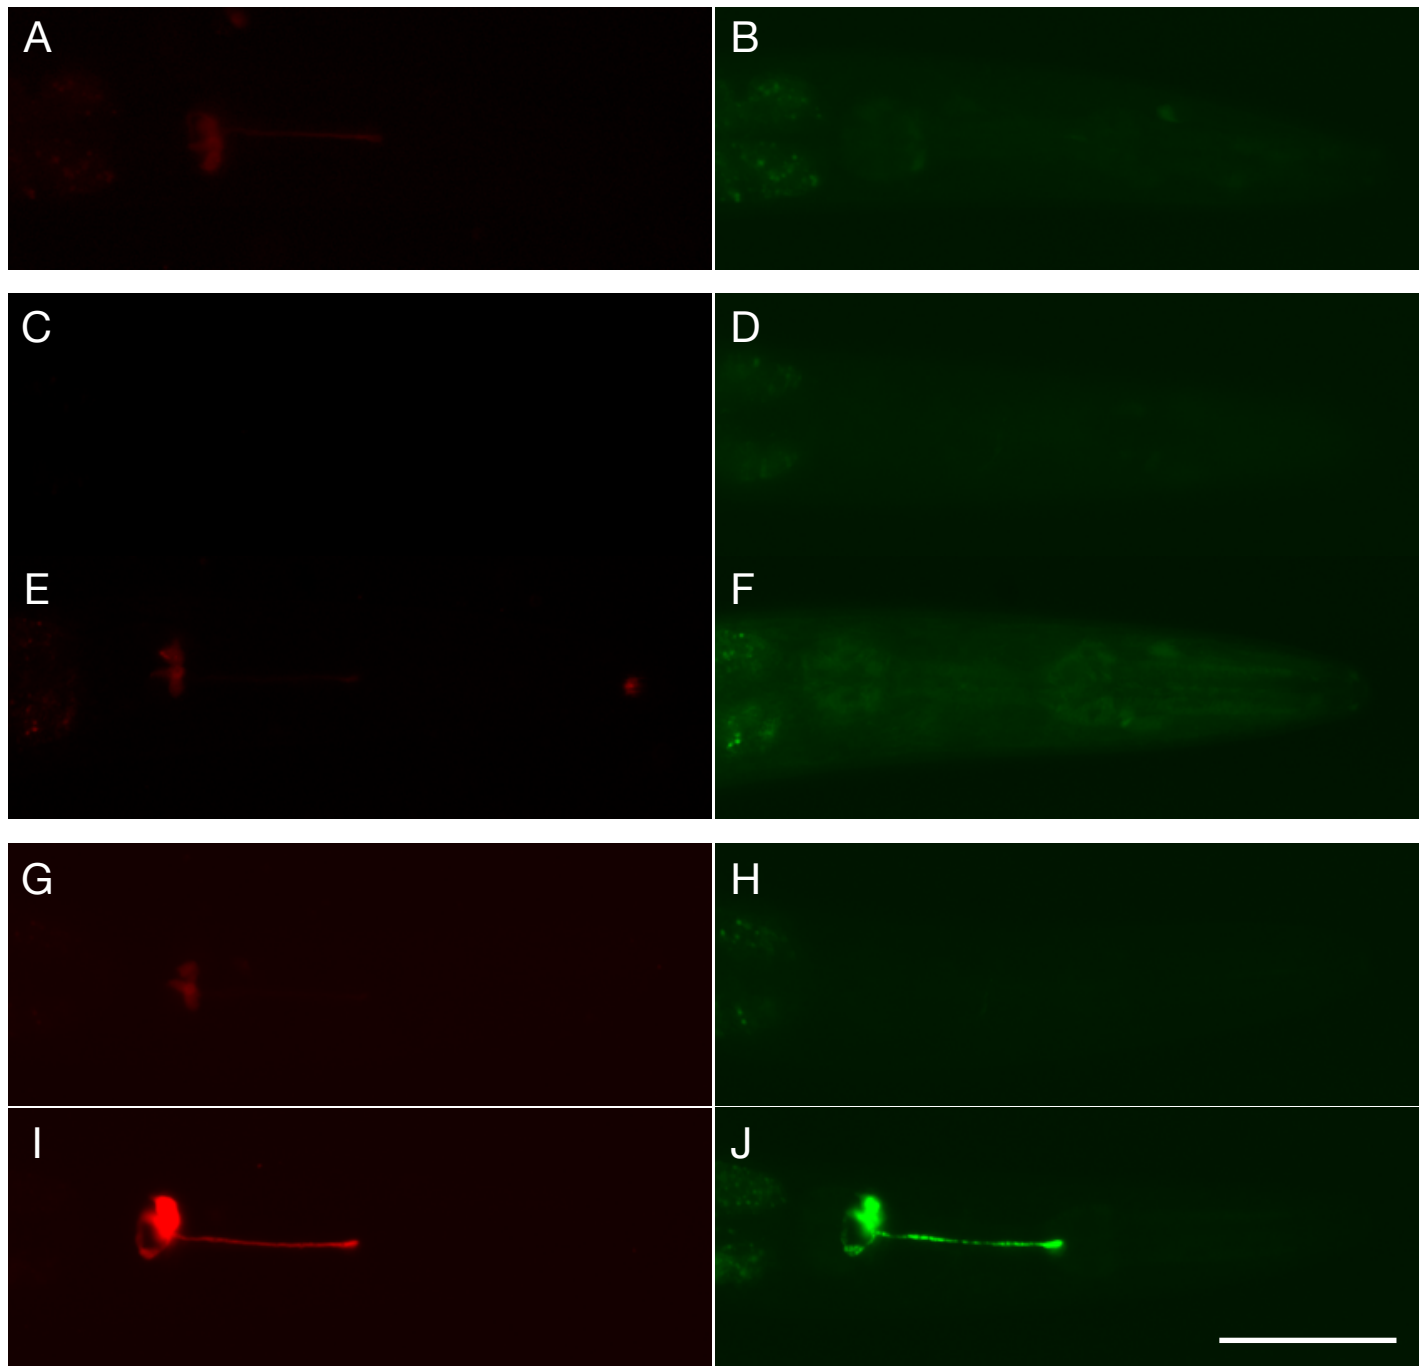

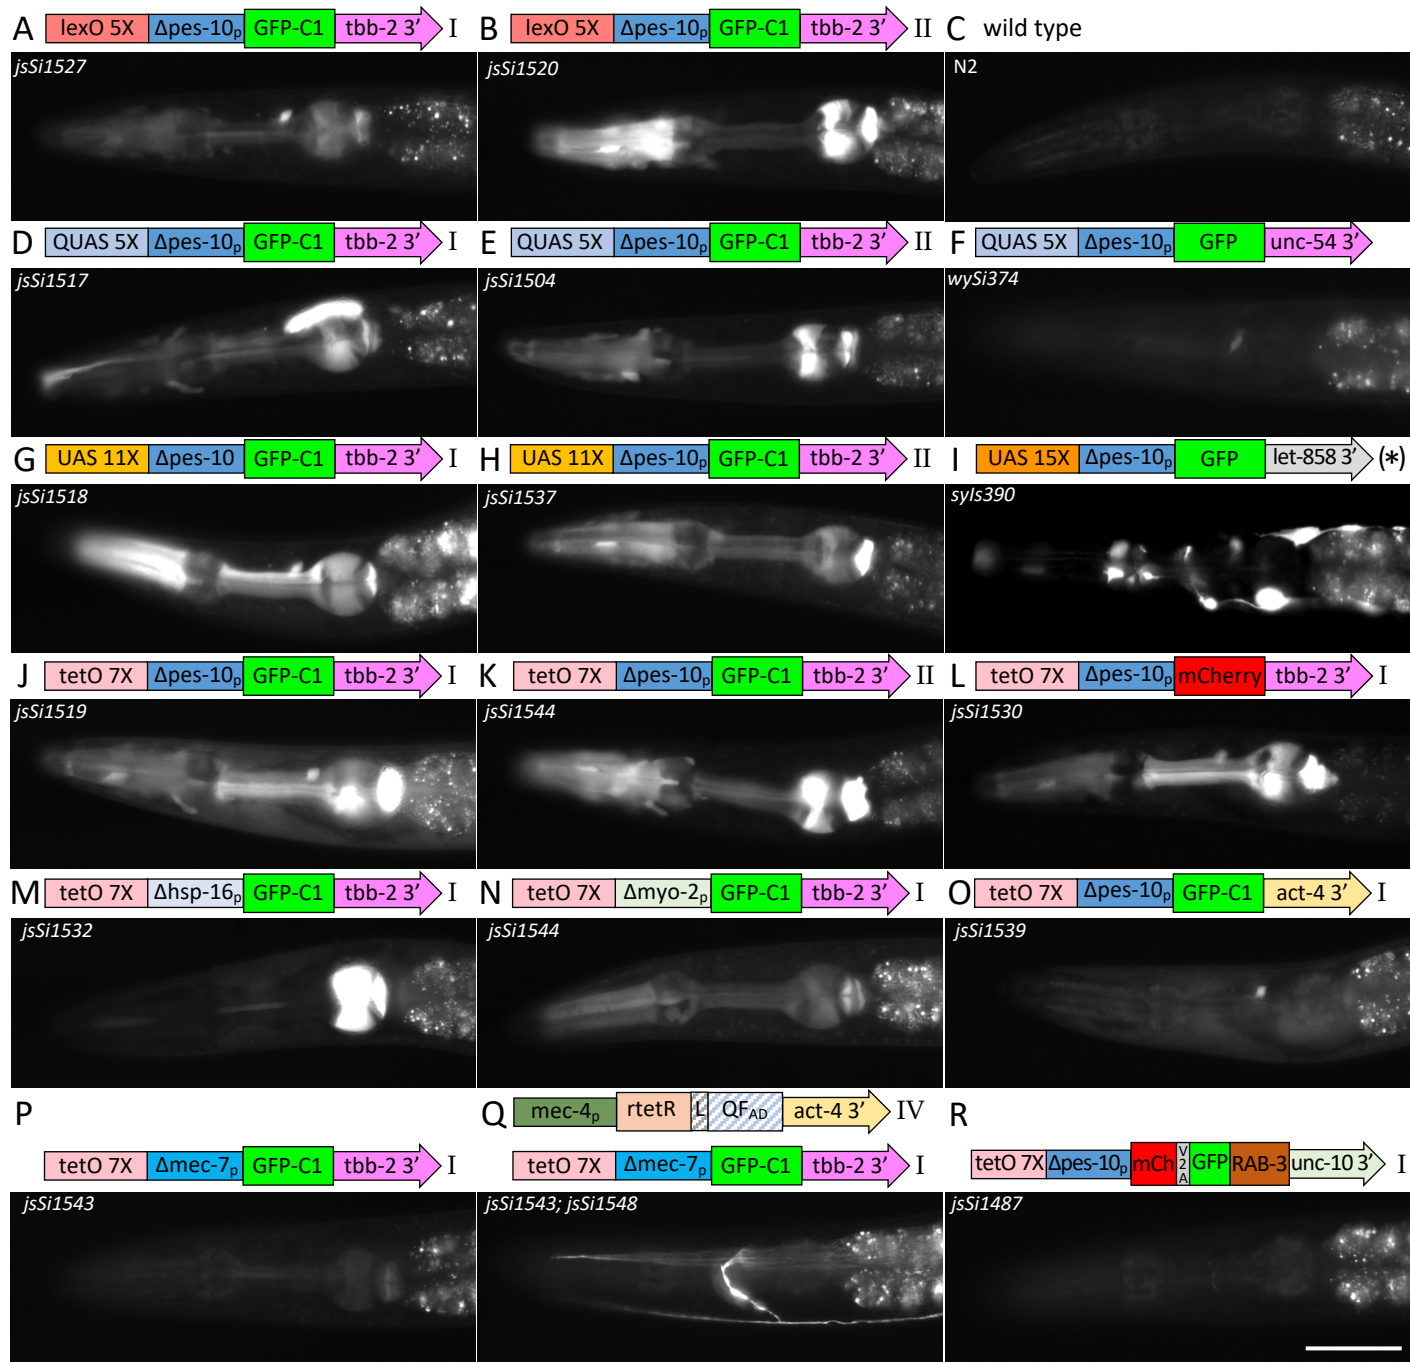

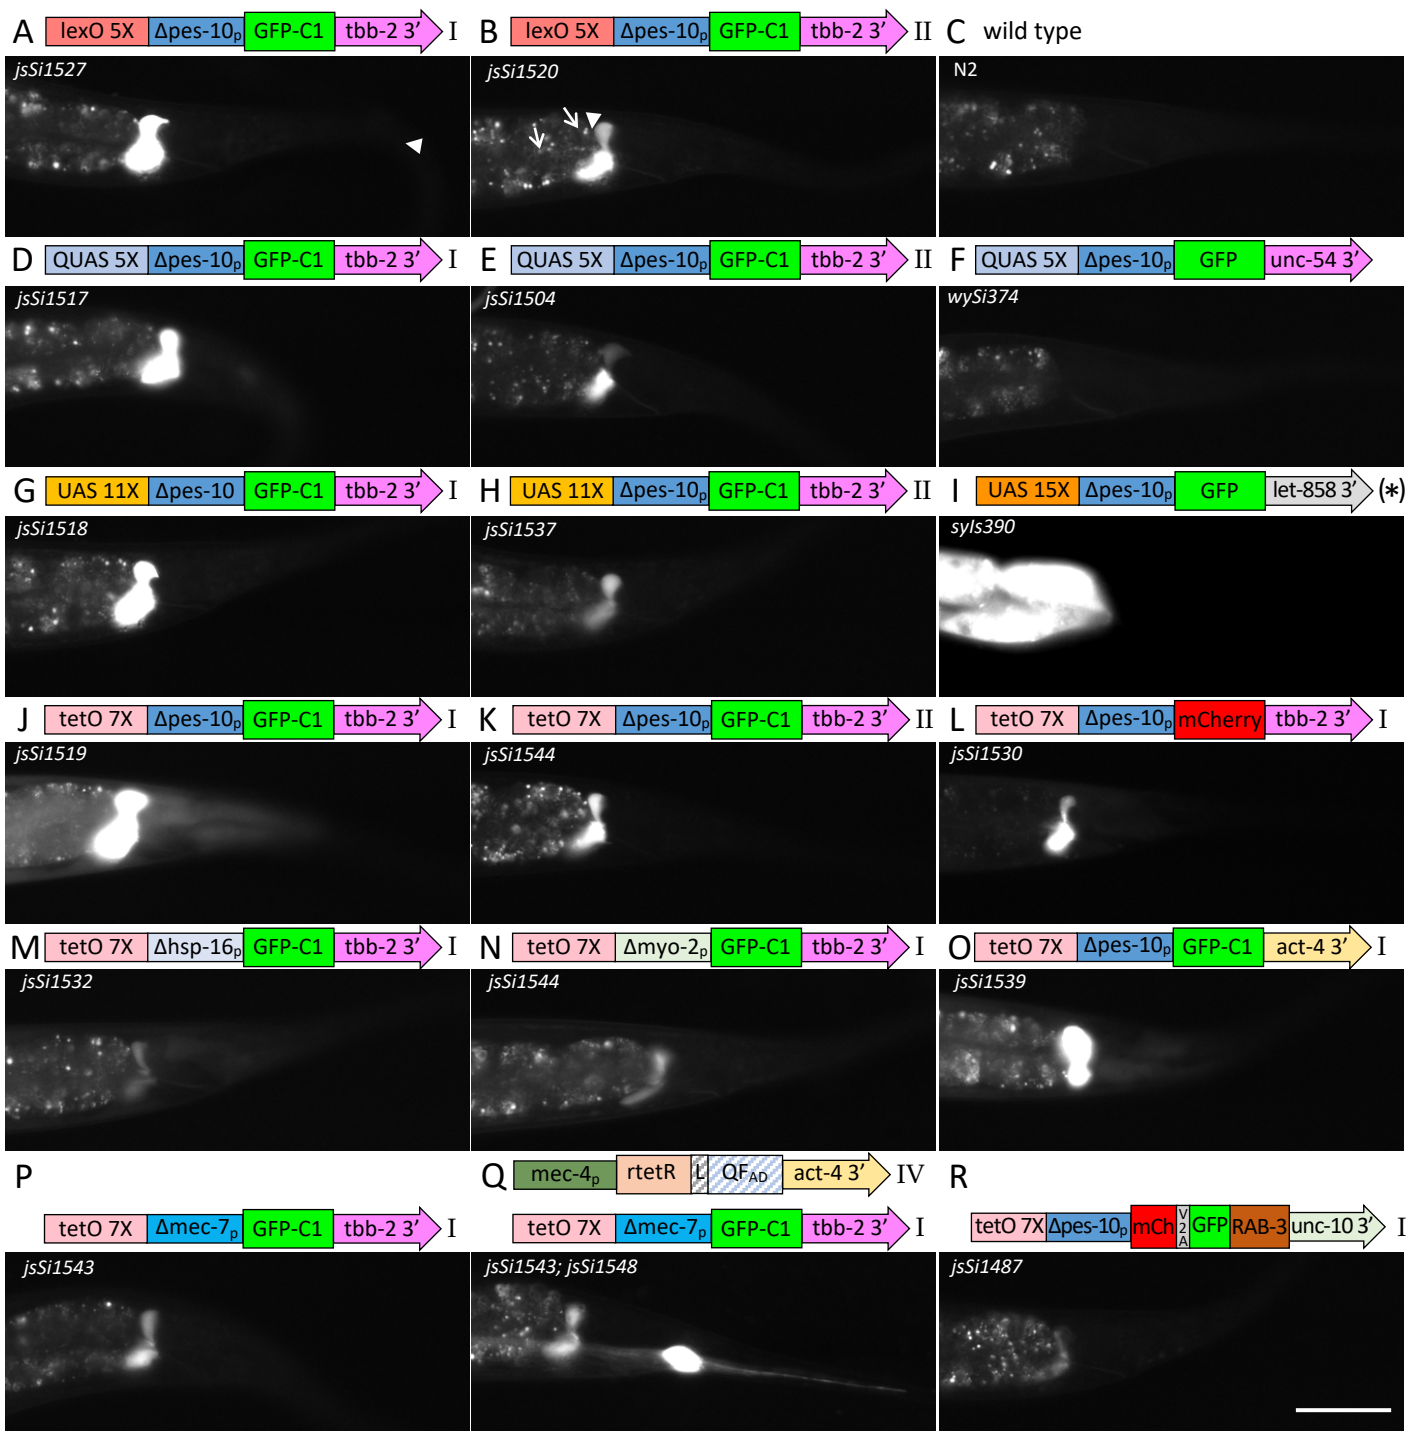

A

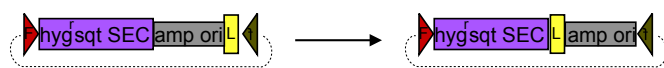

B

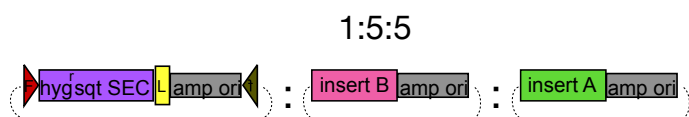

C

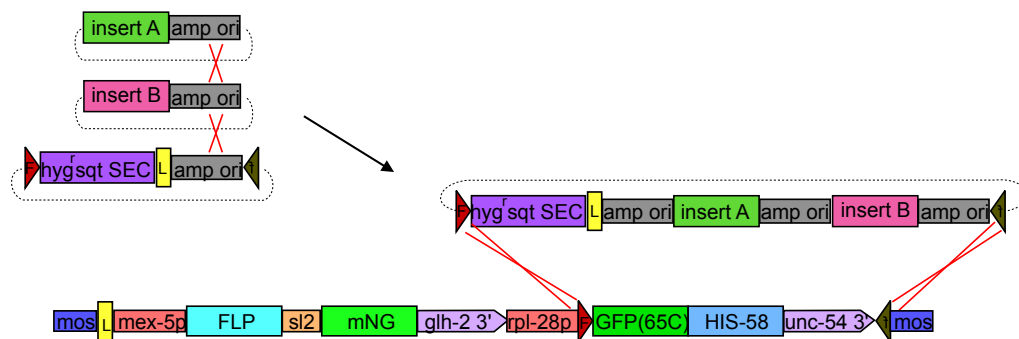

D

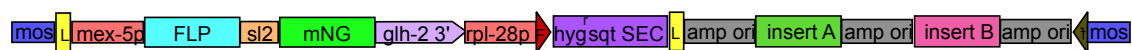

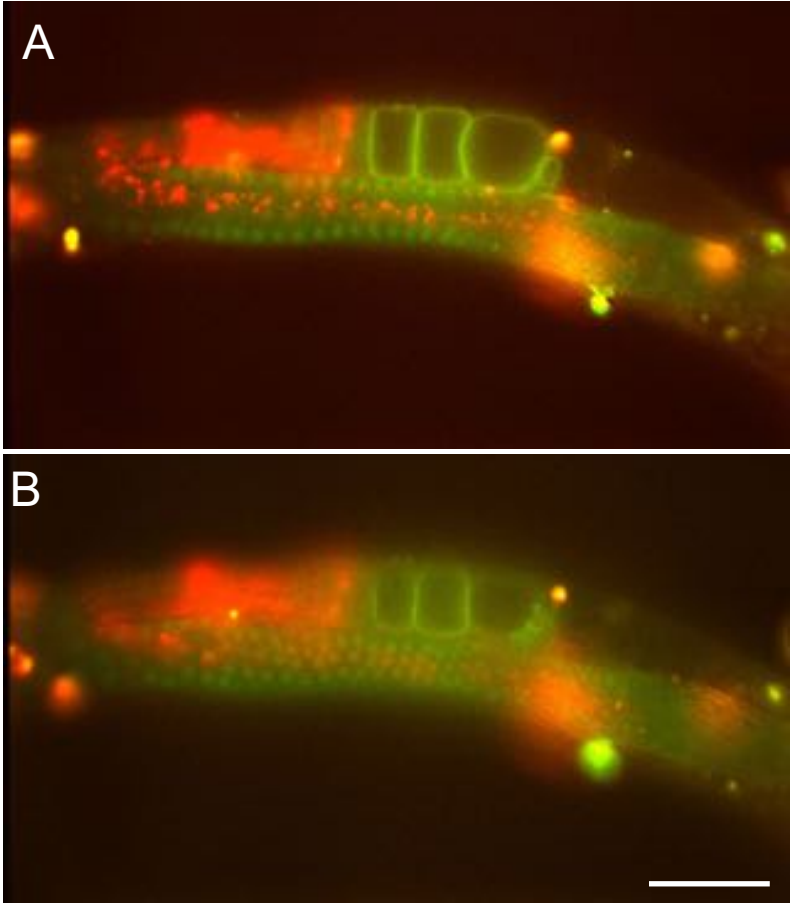



A

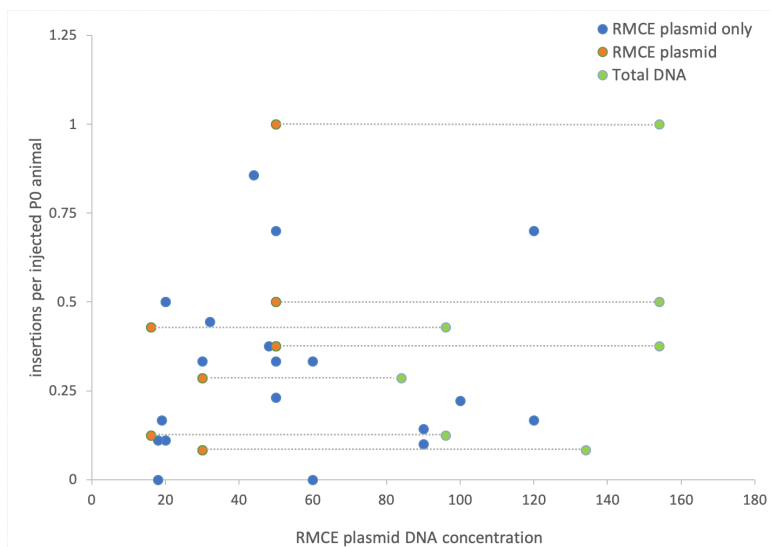

B

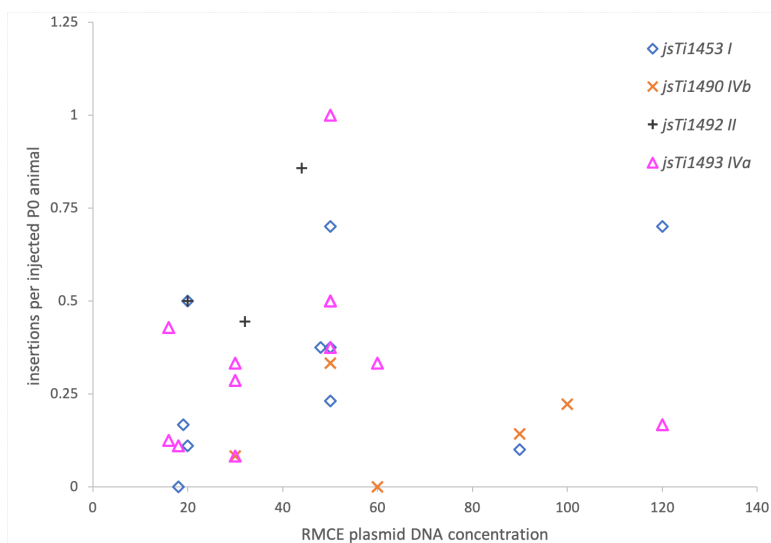

C

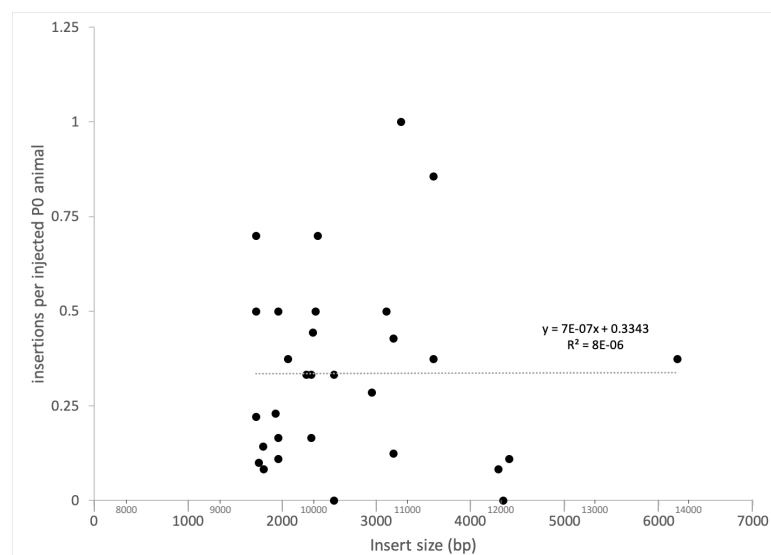

A

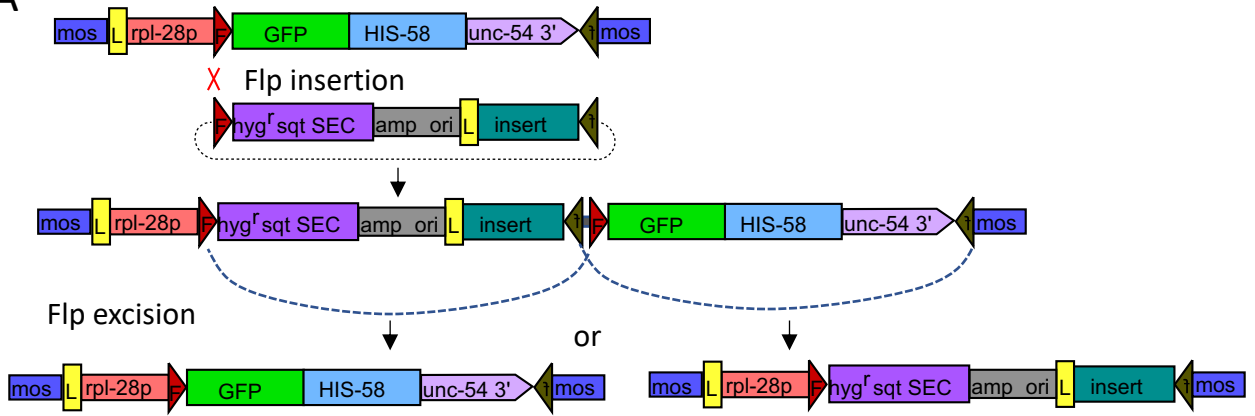

B

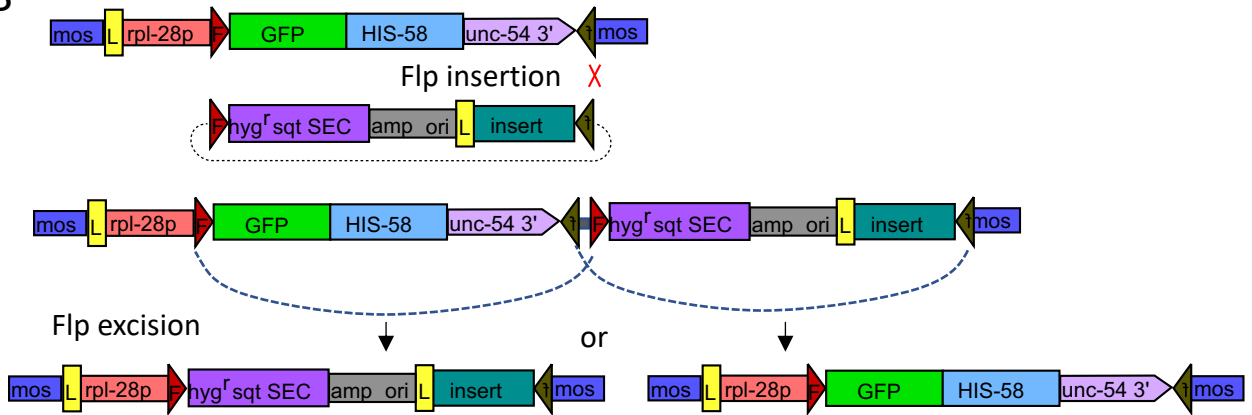

Supplement: Supplementary file 1 [file 1]
